# Supplementary material
Source: Springer Nature journal article supplement (https://www.springermedizin.de/resource/supplementary/12986_2007_135_MOESM9_ESM.pdf/25655438)

**EXFS**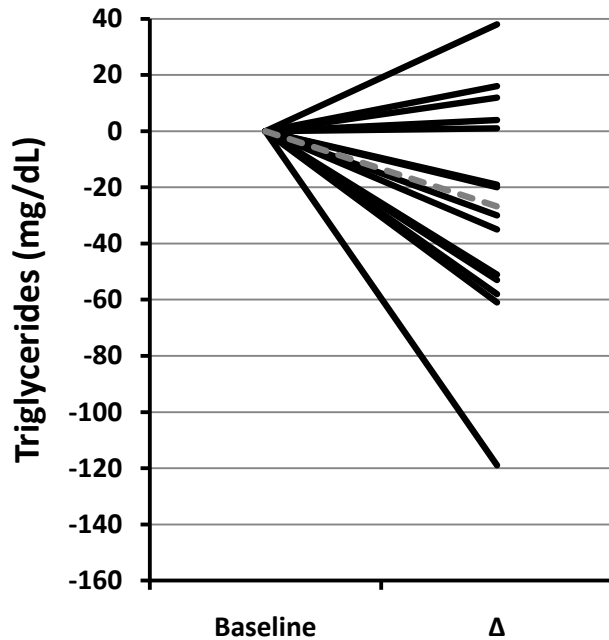**EX**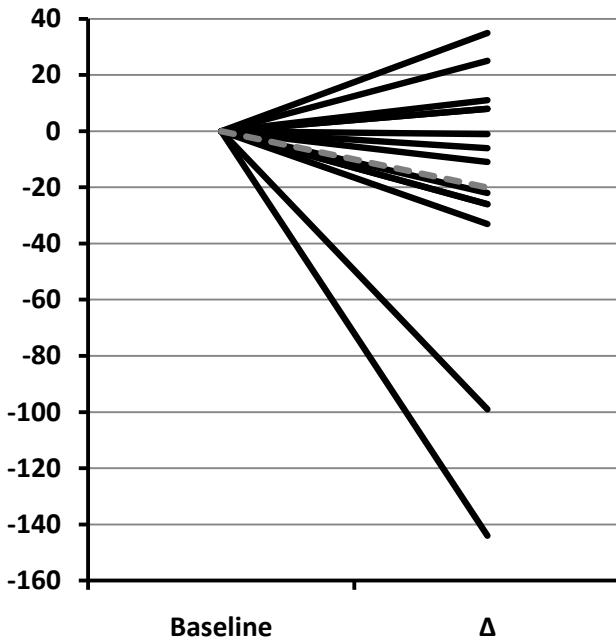**CON**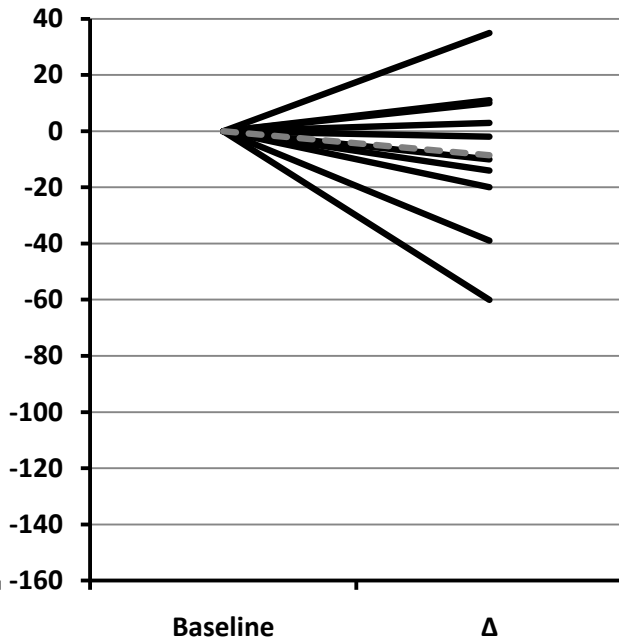

Supplement: MOESM9 [file 25655438]
